# Supplementary material for: Computational investigation of photoswitch conjugates for molecular solar energy storage
Source: Royal Society of Chemistry journal article supplement (doi:10.1039/d3cp02555a), 2023-01-01
Supplement: d3cp02555a1.pdf [file d3cp02555a1.pdf]

Supplementary information:  
Computational investigation of photoswitch conjugates  
for molecular solar energy storage

Jacob Lynge Elholm,<sup>a</sup> Zacharias Liasi,<sup>b</sup> Marie Kathrine Mikkelsen,<sup>b</sup> Andreas  
Erbs Hillers-Bendtsen,<sup>b</sup> and Kurt V. Mikkelsen<sup>\*,b</sup>

<sup>a</sup> The Institute of Materials Science of Barcelona, ICMAB-CSIC, Bellaterra, 08193  
Barcelona, Spain

<sup>b</sup> Department of Chemistry, University of Copenhagen, Universitetsparken 5, DK-2100  
Copenhagen Ø, Denmark

E-mail: [kmi@chem.ku.dk](mailto:kmi@chem.ku.dk)

## Supplementary figures

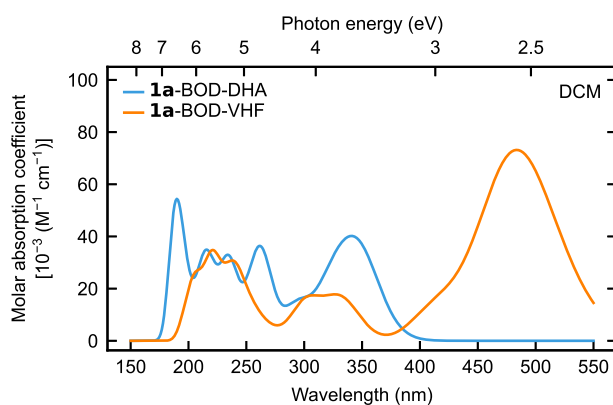

Figure S1:  $\omega$ B97-XD<sup>S1</sup>/6-311++G(d,p)<sup>S2</sup>-predicted one-photon absorption for **1a**-BOD-DHA and **1a**-BOD-VHF in DCM.

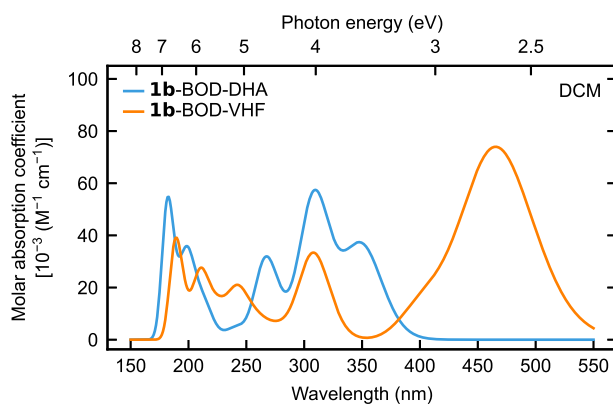

Figure S2:  $\omega$ B97-XD/6-311++G(d,p)-predicted one-photon absorption for **1b**-BOD-DHA and **1b**-BOD-VHF in DCM.

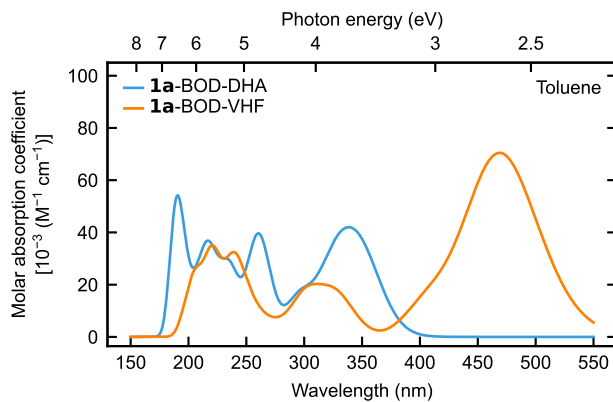

Figure S3:  $\omega$ B97-XD/6-311++G(d,p)-predicted one-photon absorption for **1a**-BOD-DHA and **1a**-BOD-VHF in toluene.

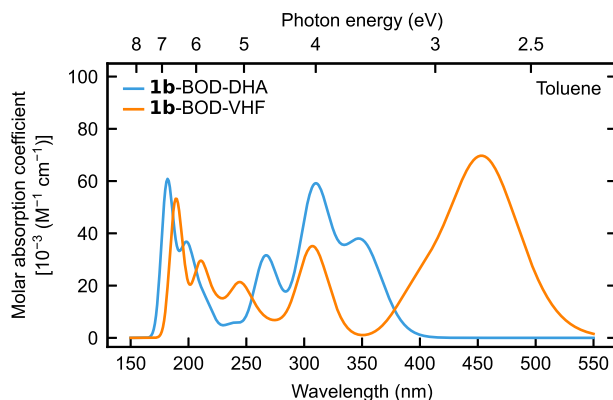

Figure S4:  $\omega$ B97-XD/6-311++G(d,p)-predicted one-photon absorption for **1b**-BOD-DHA and **1b**-BOD-VHF in toluene.

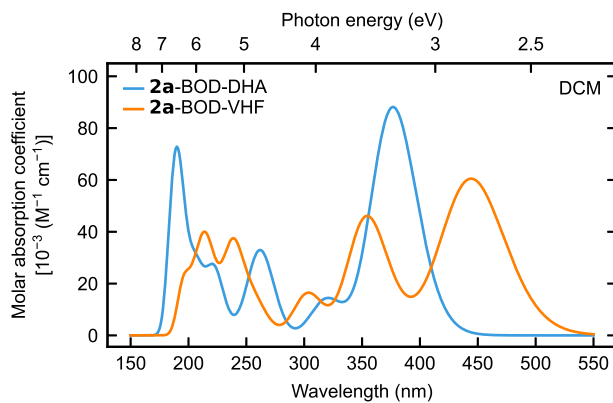

Figure S5:  $\omega$ B97-XD/6-311++G(d,p)-predicted one-photon absorption for **2a**-BOD-DHA and **2a**-BOD-VHF in DCM.

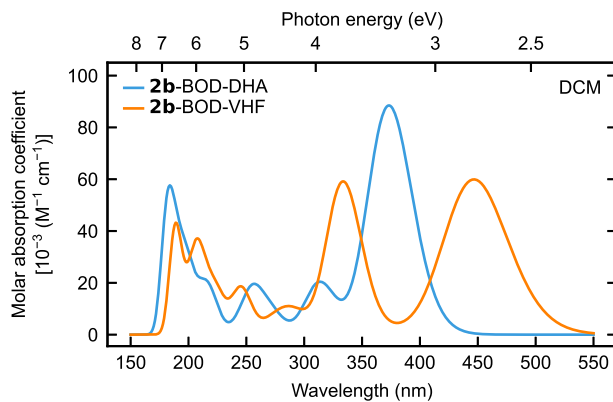

Figure S6:  $\omega$ B97-XD/6-311++G(d,p)-predicted one-photon absorption for **2b**-BOD-DHA and **2b**-BOD-VHF in DCM.

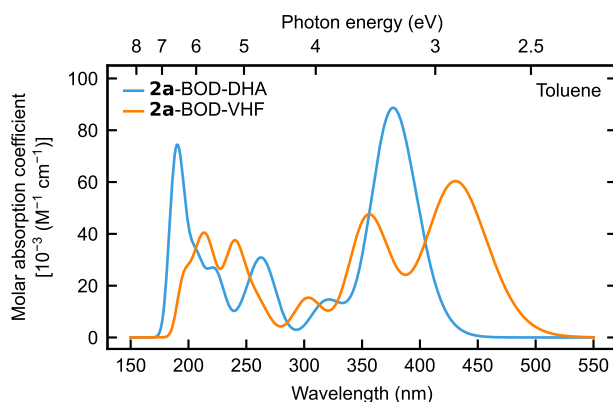

Figure S7:  $\omega$ B97-XD/6-311++G(d,p)-predicted one-photon absorption for **2a**-BOD-DHA and **2a**-BOD-VHF in toluene.

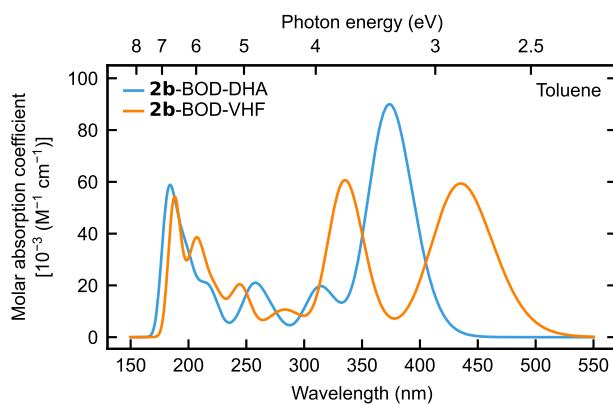

Figure S8:  $\omega$ B97-XD/6-311++G(d,p)-predicted one-photon absorption for **2b**-BOD-DHA and **2b**-BOD-VHF in toluene.

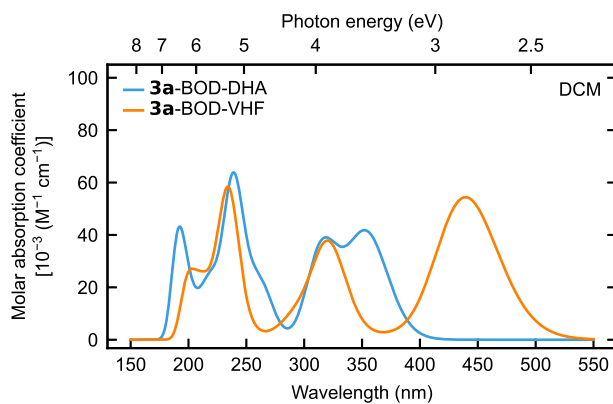

Figure S9:  $\omega$ B97-XD/6-311++G(d,p)-predicted one-photon absorption for **3a**-BOD-DHA and **3a**-BOD-VHF in DCM.

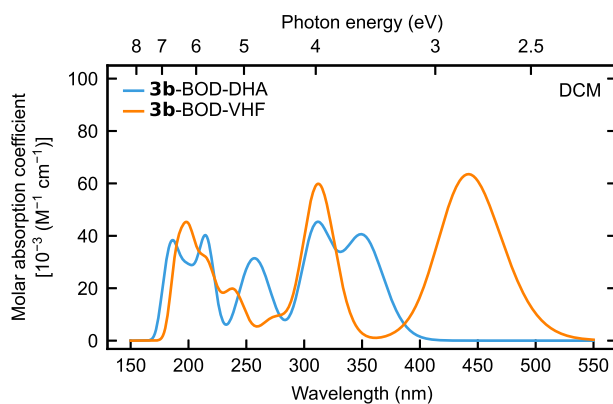

Figure S10:  $\omega$ B97-XD/6-311++G(d,p)-predicted one-photon absorption for **3b**-BOD-DHA and **3b**-BOD-VHF in DCM.

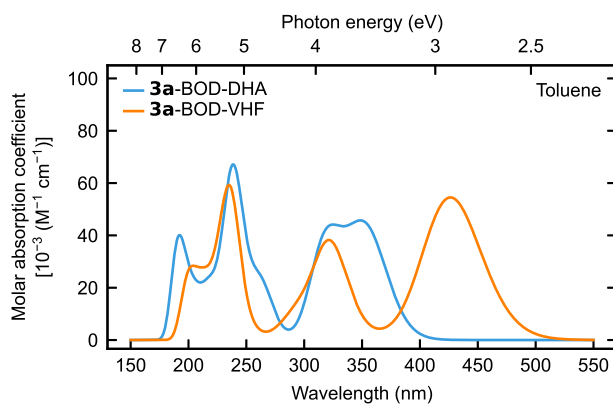

Figure S11:  $\omega$ B97-XD/6-311++G(d,p)-predicted one-photon absorption for **3a**-BOD-DHA and **3a**-BOD-VHF in toluene.

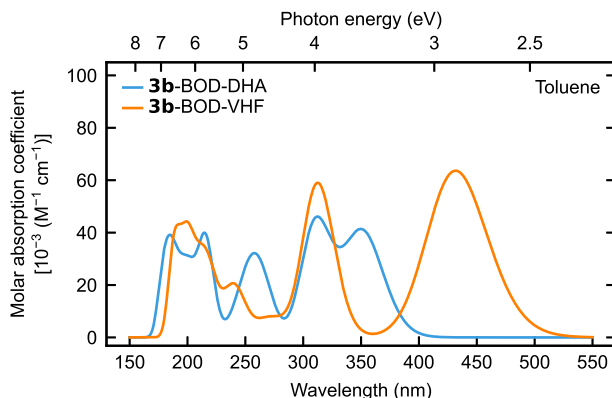

Figure S12:  $\omega$ B97-XD/6-311++G(d,p)-predicted one-photon absorption for **3b**-BOD-DHA and **3b**-BOD-VHF in toluene.

## Supplementary tables

### Storage energies and storage densities

The presented storage densities were determined using the following molecular masses:

**a**-systems (460.58 g/mol), **b**-systems (409.49 g/mol), DHA/VHF (256.31 g/mol), BOD/TCO (106.17 g/mol), BOD(CN)/TCO(CN) (131.18 g/mol), and BOD(Ph)/TCO(Ph) (182.27 g/mol).

Table S1: Storage energies (kJ/mol) for the different conjugate systems, obtained using the M06-2X<sup>S3</sup> functional in combination with the 6-311+G(d) basis set. The storage energy is defined as the energy difference between the BOD-DHA and the TCO-VHF isomers of each system.

| System    | Vacuum | DCM    | Toluene |
|-----------|--------|--------|---------|
| <b>1a</b> | 186.02 | 181.42 | 184.66  |
| <b>1b</b> | 190.24 | 183.53 | 189.30  |
| <b>2a</b> | 195.00 | 191.12 | 196.00  |
| <b>2b</b> | 193.02 | 186.65 | 193.12  |
| <b>3a</b> | 191.38 | 186.97 | 189.80  |
| <b>3b</b> | 192.56 | 186.28 | 193.39  |

Table S2: Storage densities (MJ/kg) for the different conjugate systems, obtained using the M06-2X functional in combination with the 6-311+G(d) basis set. The storage density is defined as the ratio between the storage energy and the molecular weight.

| System    | Vacuum | DCM   | Toluene |
|-----------|--------|-------|---------|
| <b>1a</b> | 0.404  | 0.394 | 0.401   |
| <b>1b</b> | 0.465  | 0.448 | 0.462   |
| <b>2a</b> | 0.423  | 0.415 | 0.426   |
| <b>2b</b> | 0.471  | 0.456 | 0.471   |
| <b>3a</b> | 0.416  | 0.406 | 0.412   |
| <b>3b</b> | 0.470  | 0.455 | 0.472   |

Table S3: Storage energies (kJ/mol) for the DHA/VHF and BOD/TCO photoswitch pairs, obtained using the M06-2X and  $\omega$ B97-XD functionals in combination with the 6-311+G(d) basis set. The storage energies are defined as the energy difference between the DHA and VHF molecules and the difference between the BOD and TCO molecules.

| Method          | System      | Vacuum   | DCM      | Toluene  |
|-----------------|-------------|----------|----------|----------|
| M06-2X          | DHA/VHF     | 32.4485  | 21.7890  | 26.6619  |
| -               | BOD/TCO     | 163.0094 | 164.8157 | 163.8837 |
| -               | BOD/TCO(CN) | 160.3104 | 163.0094 | 159.8588 |
| -               | BOD/TCO(Ph) | 162.0537 | 162.8230 | 162.3740 |
| $\omega$ B97-XD | DHA/VHF     | 31.3327  | 18.5465  | 24.6744  |
| -               | BOD/TCO     | 169.3789 | 171.3112 | 170.3057 |
| -               | BOD/TCO(CN) | 166.4803 | 166.0156 | 166.1180 |
| -               | BOD/TCO(Ph) | 168.3077 | 169.2345 | 168.6778 |

Table S4: Storage densities (kJ/mol) for the DHA/VHF and BOD/TCO photoswitch pairs, obtained using the M06-2X and  $\omega$ B97-XD functionals in combination with the 6-311+G(d) basis set. The storage densities are defined as the ratios between the storage energies and the molecular weights of the respective photoswitch pairs.

| Method          | System      | Vacuum | DCM    | Toluene |
|-----------------|-------------|--------|--------|---------|
| M06-2X          | DHA/VHF     | 0.1266 | 0.0850 | 0.1040  |
| -               | BOD/TCO     | 1.5353 | 1.5523 | 1.5435  |
| -               | BOD/TCO(CN) | 1.2220 | 1.2426 | 1.2186  |
| -               | BOD/TCO(Ph) | 0.8891 | 0.8933 | 0.8908  |
| $\omega$ B97-XD | DHA/VHF     | 0.1222 | 0.0724 | 0.0963  |
| -               | BOD/TCO     | 1.5953 | 1.6135 | 1.6040  |
| -               | BOD/TCO(CN) | 1.2690 | 1.2655 | 1.2663  |
| -               | BOD/TCO(Ph) | 0.9234 | 0.9285 | 0.9254  |

## Optimized geometries

All the presented geometries are optimized *in vacuo* at the  $\omega$ B97-XD/6-311+G(d) level in Gaussian 16.<sup>S4</sup>

Table S5: Cartesian coordinates of **1a**-BOD-DHA.

| Atom | $x$      | $y$      | $z$      | Continued |          |          |          |
|------|----------|----------|----------|-----------|----------|----------|----------|
| N    | -4.36872 | 0.70395  | 3.22300  | C         | 5.85979  | -0.96344 | -0.50766 |
| C    | -3.79182 | 0.54562  | 2.24170  | C         | 6.32681  | -0.27777 | -1.77400 |
| C    | -3.04853 | 0.39721  | 0.97698  | C         | 6.03568  | 1.01775  | -1.82111 |
| C    | -3.98756 | 0.61645  | -0.23141 | C         | 5.29778  | 1.51734  | -0.59998 |
| C    | -5.01513 | -0.35285 | -0.63392 | C         | 6.24402  | 1.26534  | 0.61958  |
| C    | -5.42723 | -0.40383 | -1.97175 | C         | 6.58647  | -0.23772 | 0.67422  |
| C    | -6.40698 | -1.29506 | -2.38009 | H         | -4.95600 | 0.24182  | -2.70533 |
| C    | -6.98809 | -2.16338 | -1.46185 | H         | -6.70788 | -1.32212 | -3.42203 |
| C    | -6.57707 | -2.13436 | -0.13560 | H         | -7.75051 | -2.86560 | -1.78176 |
| C    | -5.59758 | -1.24069 | 0.27622  | H         | -7.01936 | -2.81088 | 0.58755  |
| C    | -3.69281 | 1.78491  | -0.81992 | H         | -5.30725 | -1.23538 | 1.32058  |
| C    | -2.45555 | -0.94836 | 0.93932  | H         | -4.23948 | 2.19903  | -1.65897 |
| N    | -2.00432 | -2.00306 | 0.87687  | H         | -1.95967 | 2.11061  | 1.82221  |
| C    | -1.99399 | 1.56835  | 0.87104  | H         | -2.60841 | 4.30610  | -1.19635 |
| C    | -2.56664 | 2.45629  | -0.21005 | H         | -0.82307 | 5.31489  | 0.16536  |
| C    | -2.08214 | 3.68187  | -0.47856 | H         | 1.06257  | 4.09048  | 0.86571  |
| C    | -0.88965 | 4.23079  | 0.12525  | H         | -0.36679 | 0.12806  | 0.29648  |
| C    | 0.19519  | 3.53114  | 0.52752  | H         | 1.85889  | -1.00808 | -1.28435 |
| C    | -0.60052 | 1.17182  | 0.48128  | H         | 0.24059  | -2.77711 | -0.69256 |
| C    | 0.38873  | 2.08826  | 0.39360  | H         | 0.88183  | -4.57386 | 0.87880  |
| C    | 1.71946  | 1.63820  | 0.13255  | H         | 3.16985  | -4.60586 | 1.84435  |
| C    | 2.81467  | 1.18753  | -0.09909 | H         | 4.77684  | -2.83366 | 1.27618  |
| C    | 4.08627  | 0.62525  | -0.36097 | H         | 6.08017  | -2.03064 | -0.50970 |
| C    | 4.37645  | -0.69119 | -0.31977 | H         | 6.87467  | -0.81713 | -2.53831 |
| C    | 3.42637  | -1.77724 | -0.03031 | H         | 6.31529  | 1.68490  | -2.62858 |
| C    | 2.14249  | -1.78794 | -0.58673 | H         | 5.01633  | 2.56762  | -0.66915 |
| C    | 1.23656  | -2.78849 | -0.26369 | H         | 5.74073  | 1.58987  | 1.53346  |
| C    | 1.59748  | -3.80171 | 0.61756  | H         | 7.14490  | 1.87292  | 0.50635  |
| C    | 2.87786  | -3.81704 | 1.15842  | H         | 6.26382  | -0.67983 | 1.62028  |
| C    | 3.78593  | -2.81798 | 0.83212  | H         | 7.66278  | -0.40272 | 0.58521  |



Table S6: Cartesian coordinates of **1a**-TCO-VHF.

| Atom | <i>x</i> | <i>y</i> | <i>z</i> | Continued |          |          |          |
|------|----------|----------|----------|-----------|----------|----------|----------|
| N    | 7.20422  | 2.18326  | -0.92571 | C         | 3.65421  | -0.90124 | 0.44587  |
| C    | 6.57737  | 1.27050  | -0.60361 | C         | 2.94680  | -0.90575 | 1.64999  |
| C    | 5.78035  | 0.15683  | -0.20153 | C         | 2.25422  | -2.03889 | 2.04973  |
| C    | 6.47447  | -1.08126 | -0.05534 | C         | 2.24740  | -3.17364 | 1.24483  |
| N    | 7.05912  | -2.06911 | 0.05358  | C         | 2.93452  | -3.16919 | 0.03726  |
| C    | 4.43618  | 0.30270  | 0.06128  | C         | 3.63925  | -2.04015 | -0.35952 |
| C    | 3.85240  | 1.61525  | 0.06278  | H         | 4.56828  | 2.42681  | 0.15539  |
| C    | 2.53440  | 1.99210  | -0.04980 | H         | 1.80752  | 0.11201  | -0.80242 |
| C    | 1.47273  | 1.06892  | -0.42033 | H         | -0.43677 | 0.34589  | -0.71164 |
| C    | 0.13166  | 1.21024  | -0.38057 | H         | -5.76216 | 2.45132  | 0.83367  |
| C    | -0.69511 | 2.32326  | 0.04952  | H         | -5.71631 | 1.96011  | -1.61454 |
| C    | -2.08374 | 2.01226  | 0.12040  | H         | -5.78328 | -0.67308 | -2.30254 |
| C    | -3.21913 | 1.60331  | 0.11255  | H         | -5.80093 | -2.28778 | -0.38047 |
| C    | -4.45662 | 0.91825  | 0.04887  | H         | -7.72553 | -1.18676 | 0.80753  |
| C    | -5.78784 | 1.39487  | 0.57998  | H         | -6.43034 | -1.57881 | 1.91681  |
| C    | -5.64922 | 1.15787  | -0.89143 | H         | -6.19458 | 0.63621  | 2.51764  |
| C    | -5.64478 | -0.33138 | -1.28434 | H         | -7.62573 | 0.98460  | 1.57206  |
| C    | -5.80555 | -1.23889 | -0.09369 | H         | -2.74557 | -1.40810 | 1.51098  |
| C    | -6.69968 | -0.92411 | 1.08318  | H         | -0.52466 | -2.44946 | 1.18664  |
| C    | -6.62314 | 0.55119  | 1.51474  | H         | 0.30103  | -2.92882 | -1.09316 |
| C    | -4.47134 | -0.59409 | -0.36280 | H         | -1.11200 | -2.36864 | -3.05818 |
| C    | -3.19027 | -1.30384 | -0.58820 | H         | -3.31962 | -1.30115 | -2.72918 |
| C    | -2.39089 | -1.63299 | 0.50938  | H         | -1.00761 | 4.31929  | 0.57991  |
| C    | -1.14516 | -2.21656 | 0.32844  | H         | 1.18029  | 5.14464  | 0.37844  |
| C    | -0.67929 | -2.48488 | -0.95565 | H         | 3.15209  | 4.03426  | 0.10265  |
| C    | -1.46974 | -2.16738 | -2.05353 | H         | 2.95253  | -0.01954 | 2.27574  |
| C    | -2.71558 | -1.57354 | -1.86922 | H         | 1.72237  | -2.03778 | 2.99544  |
| C    | -0.25357 | 3.58407  | 0.31672  | H         | 1.70775  | -4.06124 | 1.55903  |
| C    | 1.08873  | 4.06929  | 0.24876  | H         | 2.93495  | -4.05152 | -0.59390 |
| C    | 2.26170  | 3.41054  | 0.08836  | H         | 4.18033  | -2.04359 | -1.29952 |

Table S7: Cartesian coordinates of **1b**-BOD-DHA.

| Atom | $x$      | $y$      | $z$      | Continued |          |          |          |
|------|----------|----------|----------|-----------|----------|----------|----------|
| N    | -4.22434 | 1.28628  | 3.01930  | C         | 6.75367  | -0.65959 | -0.29310 |
| C    | -3.65893 | 0.82256  | 2.13276  | C         | 6.56074  | -1.72114 | -1.35533 |
| C    | -2.92227 | 0.27665  | 0.97792  | C         | 5.42288  | -2.39711 | -1.23930 |
| C    | -3.79614 | 0.34321  | -0.29569 | C         | 4.56397  | -1.96108 | -0.07172 |
| C    | -4.94473 | -0.54234 | -0.52480 | C         | 5.42341  | -2.18677 | 1.21820  |
| C    | -5.34715 | -0.82405 | -1.83665 | C         | 6.74881  | -1.40956 | 1.08118  |
| C    | -6.43882 | -1.64103 | -2.08464 | H         | -4.78316 | -0.42138 | -2.67143 |
| C    | -7.14507 | -2.20361 | -1.02644 | H         | -6.73110 | -1.85102 | -3.10802 |
| C    | -6.74680 | -1.94518 | 0.27867  | H         | -7.99598 | -2.84799 | -1.21980 |
| C    | -5.65498 | -1.12514 | 0.52966  | H         | -7.28710 | -2.38313 | 1.11081  |
| C    | -3.33102 | 1.30606  | -1.10568 | H         | -5.37729 | -0.93333 | 1.55987  |
| C    | -2.52442 | -1.10464 | 1.28750  | H         | -3.80030 | 1.59735  | -2.03790 |
| N    | -2.19975 | -2.18543 | 1.50309  | H         | -1.57639 | 1.94645  | 1.47755  |
| C    | -1.70311 | 1.22662  | 0.66197  | H         | -1.88834 | 3.53023  | -1.94404 |
| C    | -2.13115 | 1.93706  | -0.60101 | H         | 0.01055  | 4.53453  | -0.74030 |
| C    | -1.46936 | 3.00021  | -1.09254 | H         | 1.69002  | 3.22259  | 0.26463  |
| C    | -0.21688 | 3.48699  | -0.56215 | H         | -0.32452 | -0.52765 | 0.39547  |
| C    | 0.75014  | 2.73868  | 0.01652  | H         | 7.66584  | -0.07974 | -0.42538 |
| C    | -0.38991 | 0.55529  | 0.39347  | H         | 7.31722  | -1.90882 | -2.10825 |
| C    | 0.72452  | 1.28508  | 0.17137  | H         | 5.12061  | -3.21362 | -1.88444 |
| C    | 1.98605  | 0.62526  | 0.04924  | H         | 3.61505  | -2.49155 | -0.01257 |
| C    | 3.08100  | 0.12868  | -0.04574 | H         | 5.60175  | -3.25757 | 1.33420  |
| C    | 4.35958  | -0.45738 | -0.15493 | H         | 4.85507  | -1.85244 | 2.08898  |
| C    | 5.51788  | 0.22207  | -0.27292 | H         | 7.60831  | -2.08199 | 1.11740  |
| C    | 5.60643  | 1.63796  | -0.30583 | H         | 6.86635  | -0.68156 | 1.88684  |
| N    | 5.70170  | 2.78744  | -0.33146 |           |          |          |          |

Table S8: Cartesian coordinates of **1b**-TCO-VHF.

| Atom | <i>x</i> | <i>y</i> | <i>z</i> | Continued |          |          |          |
|------|----------|----------|----------|-----------|----------|----------|----------|
| N    | -7.26355 | 1.52637  | -0.31158 | C         | -3.13089 | -1.09417 | 0.00115  |
| C    | -6.47449 | 0.68704  | -0.26930 | C         | -3.19799 | -2.04697 | 1.01803  |
| C    | -5.47513 | -0.33272 | -0.21758 | C         | -2.18118 | -2.98253 | 1.16422  |
| C    | -5.94701 | -1.67701 | -0.31673 | C         | -1.10069 | -2.98326 | 0.28966  |
| N    | -6.35496 | -2.75189 | -0.39656 | C         | -1.04767 | -2.05787 | -0.74780 |
| C    | -4.14607 | -0.01695 | -0.10294 | C         | -2.05464 | -1.11653 | -0.88964 |
| C    | -3.72353 | 1.36590  | -0.15144 | H         | -4.43036 | 2.06227  | -0.59510 |
| C    | -2.53623 | 1.88099  | 0.27520  | H         | -2.01221 | 0.41145  | 1.77412  |
| C    | -1.57938 | 1.14317  | 1.10102  | H         | 0.28977  | 0.53263  | 1.75037  |
| C    | -0.23826 | 1.22813  | 1.10498  | H         | 5.56114  | 2.23556  | 0.26236  |
| C    | 0.61604  | 2.08685  | 0.30508  | H         | 5.27633  | 1.40039  | -2.08568 |
| C    | 1.96121  | 1.62999  | 0.15531  | H         | 5.44700  | -1.28914 | -2.40313 |
| C    | 3.06209  | 1.15641  | 0.02529  | H         | 5.91563  | -2.60502 | -0.32803 |
| C    | 4.32031  | 0.52163  | -0.14331 | H         | 7.83586  | -1.25855 | 0.53320  |
| C    | 5.66205  | 1.16057  | 0.14308  | H         | 6.64307  | -1.51134 | 1.78859  |
| C    | 5.36126  | 0.71512  | -1.25333 | H         | 7.66309  | 1.01884  | 0.83568  |
| C    | 5.46868  | -0.80903 | -1.43425 | H         | 6.45258  | 0.76888  | 2.07483  |
| C    | 5.86191  | -1.52910 | -0.18623 | H         | 1.00647  | 3.85915  | -0.73226 |
| C    | 6.82310  | -0.98917 | 0.84552  | H         | -1.09225 | 4.93294  | -0.44224 |
| C    | 6.70458  | 0.53275  | 1.03774  | H         | -3.14576 | 3.92772  | -0.05089 |
| C    | 4.43923  | -1.02380 | -0.31910 | H         | -4.03087 | -2.03834 | 1.71341  |
| C    | 3.30681  | -1.88458 | -0.34427 | H         | -2.23293 | -3.70863 | 1.96850  |
| N    | 2.39080  | -2.58422 | -0.36982 | H         | -0.29108 | -3.69418 | 0.41081  |
| C    | 0.23603  | 3.27555  | -0.23724 | H         | -0.20179 | -2.06206 | -1.42547 |
| C    | -1.06725 | 3.87627  | -0.18905 | H         | -1.99954 | -0.37470 | -1.67961 |
| C    | -2.26624 | 3.29338  | 0.03197  |           |          |          |          |

Table S9: Cartesian coordinates of **2a**-BOD-DHA.

| Atom | <i>x</i> | <i>y</i> | <i>z</i> | Continued |          |          |          |
|------|----------|----------|----------|-----------|----------|----------|----------|
| N    | 4.10012  | -1.74172 | 2.61708  | C         | -0.04885 | 0.62357  | -0.30784 |
| C    | 4.35642  | -1.45645 | 1.53401  | C         | 1.31992  | 0.80045  | -0.37080 |
| C    | 4.68453  | -1.05904 | 0.15676  | C         | 4.27606  | 0.97318  | -0.96890 |
| C    | 6.05825  | -0.29122 | 0.03334  | C         | 4.74461  | -2.27276 | -0.67852 |
| C    | 5.71246  | 0.90915  | -0.81463 | N         | 4.81464  | -3.19816 | -1.35645 |
| C    | 6.64505  | 1.72399  | -1.34415 | H         | 6.78300  | -0.92627 | -0.48637 |
| C    | 8.05461  | 1.65395  | -1.04196 | H         | 6.32461  | 2.49927  | -2.03586 |
| C    | 8.59522  | 1.24496  | 0.13244  | H         | 8.72931  | 2.07375  | -1.78356 |
| C    | 7.85776  | 0.82929  | 1.30848  | H         | 9.66943  | 1.35841  | 0.25301  |
| C    | 6.67314  | 0.20049  | 1.31522  | H         | 8.30833  | 1.07218  | 2.26755  |
| C    | 3.64151  | -0.06969 | -0.41094 | H         | 6.16359  | 0.02103  | 2.25658  |
| C    | 2.19550  | -0.29305 | -0.32000 | H         | 2.28230  | -2.44855 | -0.13359 |
| C    | 1.64606  | -1.57212 | -0.17817 | H         | -0.13152 | -2.75436 | -0.00629 |
| C    | 0.27518  | -1.75519 | -0.11205 | H         | -3.46690 | 1.18485  | 1.63831  |
| C    | -0.59396 | -0.66180 | -0.17855 | H         | -2.82244 | 3.55981  | 1.74936  |
| C    | -2.00561 | -0.82782 | -0.10093 | H         | -4.06079 | 5.25292  | 0.42324  |
| C    | -3.20845 | -0.88926 | -0.01877 | H         | -5.96220 | 4.54094  | -1.00249 |
| C    | -4.61783 | -0.96744 | 0.06586  | H         | -6.60842 | 2.17215  | -1.11184 |
| C    | -5.45868 | 0.08271  | 0.15945  | H         | -7.59151 | 0.51384  | 0.19909  |
| C    | -5.07360 | 1.50053  | 0.24458  | H         | -7.98607 | -1.32655 | 1.83248  |
| C    | -4.00597 | 1.91651  | 1.04759  | H         | -6.38234 | -3.32293 | 1.66851  |
| C    | -3.64615 | 3.25606  | 1.11104  | H         | -4.61144 | -3.13609 | -0.10200 |
| C    | -4.34291 | 4.20635  | 0.37270  | H         | -5.43633 | -2.09612 | -2.23850 |
| C    | -5.41098 | 3.80730  | -0.42310 | H         | -6.67385 | -3.15372 | -1.56344 |
| C    | -5.77714 | 2.46928  | -0.47967 | H         | -6.90656 | -0.29156 | -2.09878 |
| C    | -6.91829 | -0.33548 | 0.08547  | H         | -8.14196 | -1.34396 | -1.41227 |
| C    | -7.17173 | -1.40963 | 1.12179  | H         | -0.71413 | 1.47927  | -0.34631 |
| C    | -6.34046 | -2.44253 | 1.03746  | H         | 1.71756  | 1.80763  | -0.43567 |
| C    | -5.32267 | -2.31147 | -0.07226 | H         | 3.77771  | 1.78110  | -1.49157 |
| C    | -6.13360 | -2.21743 | -1.40619 |           |          |          |          |
| C    | -7.10319 | -1.02170 | -1.30945 |           |          |          |          |

Table S10: Cartesian coordinates of **2a**-TCO-VHF.

| Atom | <i>x</i> | <i>y</i> | <i>z</i> | Continued |          |          |          |
|------|----------|----------|----------|-----------|----------|----------|----------|
| N    | -4.09678 | -4.59835 | 0.63829  | C         | 1.21003  | 2.76272  | 1.14752  |
| C    | -4.43721 | -3.50716 | 0.48931  | C         | 1.56499  | 2.42971  | -0.15649 |
| C    | -4.89244 | -2.16666 | 0.30677  | C         | 2.65282  | 1.60386  | -0.39551 |
| C    | -6.30626 | -1.97580 | 0.36910  | C         | -0.68304 | -2.40658 | -1.03007 |
| N    | -7.44449 | -1.79887 | 0.41869  | C         | -2.05481 | -2.25137 | -0.90053 |
| C    | -4.04252 | -1.10353 | 0.11843  | H         | -5.54063 | 0.35597  | 0.58866  |
| C    | -4.56855 | 0.24076  | 0.11735  | H         | -5.75292 | 2.50496  | 0.13185  |
| C    | -4.00009 | 1.37890  | -0.38812 | H         | -4.96514 | 4.66214  | 0.12749  |
| C    | -4.70965 | 2.62940  | -0.14904 | H         | -2.74781 | 5.43120  | -0.19357 |
| C    | -4.24576 | 3.89830  | -0.15615 | H         | -0.99584 | 4.26202  | -1.22255 |
| C    | -2.92361 | 4.38754  | -0.43890 | H         | -1.12364 | 2.08873  | -2.17378 |
| C    | -1.91302 | 3.71192  | -1.02914 | H         | -2.63706 | 0.43080  | -1.76176 |
| C    | -1.94469 | 2.35950  | -1.51495 | H         | -2.10925 | 0.12384  | 1.51963  |
| C    | -2.82897 | 1.37181  | -1.25943 | H         | 0.33303  | -0.16254 | 1.30482  |
| C    | -2.58284 | -1.33485 | 0.01009  | H         | 5.13345  | -2.96259 | -1.15814 |
| C    | -1.70904 | -0.59130 | 0.80910  | H         | 5.13523  | -2.74121 | 1.33037  |
| C    | -0.34254 | -0.74916 | 0.69185  | H         | 5.75763  | -0.27681 | 2.30675  |
| C    | 0.18933  | -1.65429 | -0.23915 | H         | 6.17086  | 1.49381  | 0.57592  |
| C    | 1.60794  | -1.73514 | -0.35275 | H         | 7.83641  | 0.15110  | -0.74092 |
| C    | 2.81073  | -1.65084 | -0.33411 | H         | 6.66558  | 0.91728  | -1.79147 |
| C    | 4.17382  | -1.27804 | -0.20767 | H         | 6.01091  | -1.12761 | -2.63242 |
| C    | 5.37977  | -1.97008 | -0.79027 | H         | 7.29790  | -1.86888 | -1.70633 |
| C    | 5.25945  | -1.86990 | 0.70093  | H         | 3.60754  | 1.01742  | 2.79828  |
| C    | 5.57140  | -0.46743 | 1.25700  | H         | 1.68796  | 2.51526  | 3.22859  |
| C    | 5.95523  | 0.50599  | 0.17531  | H         | 0.35127  | 3.40023  | 1.33330  |
| C    | 6.78227  | 0.13659  | -1.03428 | H         | 0.98833  | 2.81163  | -0.99229 |
| C    | 6.40894  | -1.23752 | -1.61934 | H         | 2.91496  | 1.33168  | -1.41344 |
| C    | 4.50533  | 0.14283  | 0.37012  | H         | -0.28215 | -3.10950 | -1.75136 |
| C    | 3.40583  | 1.09066  | 0.66401  | H         | -2.71875 | -2.83115 | -1.53227 |
| C    | 3.04455  | 1.42802  | 1.96574  |           |          |          |          |
| C    | 1.95778  | 2.26494  | 2.20758  |           |          |          |          |

Table S11: Cartesian coordinates of **2b**-BOD-DHA.

| Atom | <i>x</i> | <i>y</i> | <i>z</i> | Continued |          |          |          |
|------|----------|----------|----------|-----------|----------|----------|----------|
| N    | -3.39689 | -2.24862 | 2.15004  | C         | 7.78002  | 0.09922  | -1.17346 |
| C    | -3.66570 | -1.70920 | 1.17186  | C         | 0.54576  | 1.18048  | 0.07928  |
| C    | -4.00975 | -0.99164 | -0.06480 | C         | -0.83294 | 1.24281  | 0.01843  |
| C    | -5.45073 | -0.34752 | -0.03905 | C         | -3.78658 | 1.29592  | -0.59623 |
| C    | -5.21166 | 1.06238  | -0.52315 | C         | -3.93452 | -1.94003 | -1.19153 |
| C    | -6.21040 | 1.90251  | -0.85553 | N         | -3.89767 | -2.65421 | -2.09122 |
| C    | -7.61113 | 1.62738  | -0.64293 | H         | -6.09962 | -0.88384 | -0.73903 |
| C    | -8.12770 | 0.87121  | 0.35702  | H         | -5.95588 | 2.86085  | -1.30161 |
| C    | -7.37259 | 0.22313  | 1.41042  | H         | -8.31129 | 2.16870  | -1.27379 |
| C    | -6.13263 | -0.27570 | 1.30001  | H         | -9.20964 | 0.85108  | 0.45845  |
| C    | -3.06121 | 0.20380  | -0.30904 | H         | -7.86074 | 0.15817  | 2.37954  |
| C    | -1.60074 | 0.09626  | -0.22889 | H         | -5.62426 | -0.65536 | 2.18058  |
| C    | -0.93505 | -1.12431 | -0.38722 | H         | -1.48533 | -2.03794 | -0.57939 |
| C    | 0.44618  | -1.19445 | -0.32262 | H         | 0.94497  | -2.14806 | -0.45199 |
| C    | 1.20553  | -0.04362 | -0.09312 | H         | 8.08318  | 1.62665  | 0.39306  |
| C    | 2.62672  | -0.10193 | -0.02420 | H         | 8.57662  | -0.24774 | 1.98755  |
| C    | 3.83144  | -0.10635 | 0.03945  | H         | 7.13116  | -2.34761 | 1.70686  |
| C    | 5.23989  | -0.10138 | 0.11199  | H         | 5.42143  | -2.25125 | -0.12521 |
| C    | 6.00581  | 0.99855  | 0.25973  | H         | 7.51605  | -2.04791 | -1.51156 |
| C    | 5.49067  | 2.31658  | 0.36366  | H         | 6.22923  | -1.05978 | -2.19732 |
| N    | 5.09535  | 3.39720  | 0.44722  | H         | 7.56101  | 0.84208  | -1.94356 |
| C    | 7.49843  | 0.72174  | 0.23517  | H         | 8.84209  | -0.14424 | -1.24382 |
| C    | 7.79545  | -0.36588 | 1.24586  | H         | 1.12651  | 2.07497  | 0.27431  |
| C    | 7.04688  | -1.45364 | 1.10029  | H         | -1.32283 | 2.19484  | 0.19075  |
| C    | 6.05874  | -1.37225 | -0.04360 | H         | -3.36366 | 2.25630  | -0.86652 |
| C    | 6.90439  | -1.15915 | -1.34441 |           |          |          |          |

Table S12: Cartesian coordinates of **2b**-TCO-VHF.

| Atom | <i>x</i> | <i>y</i> | <i>z</i> | Continued |          |          |          |
|------|----------|----------|----------|-----------|----------|----------|----------|
| N    | -3.22960 | -4.58324 | 0.42218  | C         | 6.55756  | -0.66894 | -1.75723 |
| C    | -3.75885 | -3.56437 | 0.31817  | C         | 5.17566  | 0.66941  | 0.63110  |
| C    | -4.44032 | -2.31732 | 0.18607  | C         | 4.40533  | 1.68686  | 1.26009  |
| C    | -5.86645 | -2.38252 | 0.17460  | N         | 3.77706  | 2.50887  | 1.76872  |
| N    | -7.01902 | -2.41190 | 0.16534  | C         | -0.21985 | -0.26341 | 0.97640  |
| C    | -3.78423 | -1.11185 | 0.10595  | C         | -1.60079 | -0.32521 | 1.00977  |
| C    | -4.53270 | 0.11782  | 0.13696  | H         | -5.54429 | 0.02992  | 0.52327  |
| C    | -4.13832 | 1.37373  | -0.24735 | H         | -2.51432 | 0.78375  | -1.53437 |
| C    | -2.91985 | 1.63702  | -1.00383 | H         | -1.30333 | 2.70952  | -1.71235 |
| C    | -2.21475 | 2.78331  | -1.12466 | H         | -1.65912 | 4.79868  | -0.65300 |
| C    | -2.47392 | 4.08468  | -0.57488 | H         | -3.67999 | 5.56656  | 0.26251  |
| C    | -3.63806 | 4.52662  | -0.04866 | H         | -5.73024 | 4.38652  | 0.35461  |
| C    | -4.86165 | 3.78750  | 0.09352  | H         | -6.09958 | 2.12814  | 0.18668  |
| C    | -5.08015 | 2.45690  | -0.00154 | H         | -2.11954 | -2.40703 | -1.61889 |
| C    | -2.30082 | -1.09390 | 0.07687  | H         | 0.33961  | -2.28245 | -1.69646 |
| C    | -1.58876 | -1.80816 | -0.88690 | H         | 5.04883  | -2.20716 | -1.34960 |
| C    | -0.20596 | -1.73633 | -0.93542 | H         | 5.42680  | -2.39358 | 1.12154  |
| C    | 0.49482  | -0.96107 | -0.00608 | H         | 6.53035  | -0.21495 | 2.30821  |
| C    | 1.91820  | -0.86763 | -0.05084 | H         | 7.07241  | 1.69624  | 0.78710  |
| C    | 3.11840  | -0.76386 | -0.06575 | H         | 8.27906  | 0.42369  | -0.99179 |
| C    | 4.52579  | -0.57832 | -0.04149 | H         | 7.04874  | 1.45255  | -1.69245 |
| C    | 5.51640  | -1.33961 | -0.89252 | H         | 6.08719  | -0.38398 | -2.70200 |
| C    | 5.60460  | -1.46499 | 0.59657  | H         | 7.32208  | -1.41047 | -2.00545 |
| C    | 6.23717  | -0.23308 | 1.26734  | H         | 0.31957  | 0.33329  | 1.70321  |
| C    | 6.64477  | 0.82642  | 0.29595  | H         | -2.14788 | 0.23281  | 1.76195  |
| C    | 7.19750  | 0.55726  | -1.08326 |           |          |          |          |

Table S13: Cartesian coordinates of **3a**-BOD-DHA.

| Atom | $x$      | $y$      | $z$      | Continued |          |          |          |
|------|----------|----------|----------|-----------|----------|----------|----------|
| N    | 1.80075  | -1.33370 | -2.08734 | C         | -6.19380 | 1.19308  | -1.24653 |
| C    | 2.30759  | -0.89046 | -1.15614 | C         | -6.44291 | -0.32817 | -1.29290 |
| C    | 3.02044  | -0.30814 | -0.00432 | C         | 0.59857  | 1.58596  | -0.00985 |
| C    | 4.53231  | -0.75752 | -0.07437 | C         | 4.31739  | 1.60125  | -0.48183 |
| C    | 5.24615  | 0.49350  | -0.52448 | C         | 2.34834  | -0.72687 | 1.23419  |
| C    | 6.53223  | 0.49834  | -0.92410 | N         | 1.85243  | -1.04380 | 2.22086  |
| C    | 7.42108  | -0.63392 | -0.81912 | H         | 4.64210  | -1.54813 | -0.82369 |
| C    | 7.36850  | -1.59750 | 0.13362  | H         | 6.94377  | 1.41468  | -1.34025 |
| C    | 6.42887  | -1.65299 | 1.23541  | H         | 8.27131  | -0.64593 | -1.49615 |
| C    | 5.16072  | -1.21694 | 1.21287  | H         | 8.17779  | -2.32277 | 0.15410  |
| C    | 3.07147  | 1.23003  | -0.14908 | H         | 6.80498  | -2.07122 | 2.16570  |
| C    | 1.89750  | 2.09259  | 0.03656  | H         | 4.57288  | -1.21837 | 2.12517  |
| C    | 2.07361  | 3.46345  | 0.27074  | H         | 3.07279  | 3.87579  | 0.35718  |
| C    | 0.98007  | 4.29989  | 0.42516  | H         | 1.13437  | 5.35778  | 0.60861  |
| C    | -0.30991 | 3.79108  | 0.36530  | H         | -1.16698 | 4.44212  | 0.49514  |
| C    | -0.51031 | 2.42437  | 0.15333  | H         | -4.29851 | -2.92818 | 1.40326  |
| C    | -1.82143 | 1.86740  | 0.10910  | H         | -2.57996 | -4.69002 | 1.30169  |
| C    | -2.90044 | 1.32825  | 0.07631  | H         | -0.65424 | -4.46434 | -0.24614 |
| C    | -4.16849 | 0.70195  | 0.05434  | H         | -0.47246 | -2.46096 | -1.69735 |
| C    | -4.38566 | -0.62686 | 0.00775  | H         | -2.18675 | -0.69528 | -1.58870 |
| C    | -3.35983 | -1.67946 | -0.07866 | H         | -6.03017 | -2.05153 | 0.00711  |
| C    | -3.46340 | -2.82522 | 0.71663  | H         | -7.17676 | -0.81620 | 1.86540  |
| C    | -2.49292 | -3.81643 | 0.66364  | H         | -6.75027 | 1.71171  | 1.93868  |
| C    | -1.41121 | -3.68819 | -0.20074 | H         | -5.22793 | 2.59956  | 0.15153  |
| C    | -1.30580 | -2.56332 | -1.01113 | H         | -5.58574 | 1.52106  | -2.09302 |
| C    | -2.27031 | -1.56602 | -0.94770 | H         | -7.13348 | 1.74922  | -1.28151 |
| C    | -5.86561 | -0.97432 | 0.01187  | H         | -7.50990 | -0.55381 | -1.35704 |
| C    | -6.54609 | -0.27549 | 1.16847  | H         | -5.95838 | -0.78433 | -2.15953 |
| C    | -6.32542 | 1.03437  | 1.20652  | H         | 0.40724  | 0.53221  | -0.17766 |
| C    | -5.44487 | 1.53408  | 0.08241  | H         | 4.61329  | 2.61893  | -0.70678 |



Table S14: Cartesian coordinates of **3a**-TCO-VHF.

| Atom | <i>x</i> | <i>y</i> | <i>z</i> | Continued |          |          |          |
|------|----------|----------|----------|-----------|----------|----------|----------|
| N    | 0.27558  | 3.70555  | 2.06520  | C         | -2.02008 | 1.81177  | -1.18614 |
| C    | 1.08550  | 3.22557  | 1.40013  | C         | -0.75292 | 2.18512  | -1.62699 |
| C    | 2.08656  | 2.66760  | 0.54982  | C         | 0.13464  | 1.22392  | -2.09481 |
| C    | 2.63999  | 3.54961  | -0.42629 | C         | -0.25220 | -0.11374 | -2.12006 |
| N    | 3.08729  | 4.23769  | -1.23651 | C         | -1.51920 | -0.48188 | -1.68606 |
| C    | 2.48190  | 1.35574  | 0.61585  | C         | 0.42131  | 0.24988  | 1.42834  |
| C    | 3.57457  | 0.88899  | -0.19952 | H         | 4.26112  | 1.65980  | -0.53885 |
| C    | 3.83781  | -0.39000 | -0.61548 | H         | 5.50600  | 0.32795  | -1.75709 |
| C    | 5.06316  | -0.58994 | -1.37732 | H         | 6.68503  | -1.59280 | -2.17383 |
| C    | 5.75549  | -1.72364 | -1.62578 | H         | 6.27176  | -3.79122 | -1.40419 |
| C    | 5.47075  | -3.07708 | -1.23505 | H         | 4.25362  | -4.62466 | -0.54645 |
| C    | 4.30888  | -3.55687 | -0.73894 | H         | 2.21714  | -3.43333 | -0.32768 |
| C    | 3.09666  | -2.82029 | -0.50809 | H         | 1.86192  | -1.18354 | -0.29093 |
| C    | 2.88716  | -1.48643 | -0.46507 | H         | 3.58026  | -0.17708 | 2.58048  |
| C    | 1.79157  | 0.43152  | 1.54822  | H         | 2.39622  | -1.78693 | 4.03949  |
| C    | 2.50762  | -0.31111 | 2.48957  | H         | -0.03452 | -2.16958 | 3.76467  |
| C    | 1.84181  | -1.22158 | 3.29810  | H         | -5.33022 | -1.86704 | 1.76957  |
| C    | 0.47498  | -1.43390 | 3.15219  | H         | -5.36920 | 0.63011  | 1.86372  |
| C    | -0.24570 | -0.70353 | 2.20580  | H         | -5.15597 | 1.91622  | -0.52492 |
| C    | -1.62945 | -0.88928 | 1.91244  | H         | -4.87331 | 0.42749  | -2.52735 |
| C    | -2.73896 | -0.87478 | 1.44069  | H         | -5.45292 | -1.98580 | -2.45478 |
| C    | -3.90033 | -0.70484 | 0.64429  | H         | -6.84579 | -1.03707 | -1.98372 |
| C    | -5.24160 | -1.37396 | 0.80505  | H         | -6.95816 | -2.29399 | -0.05641 |
| C    | -5.16195 | 0.11792  | 0.93342  | H         | -5.44286 | -3.08781 | -0.42821 |
| C    | -5.00180 | 0.85028  | -0.41228 | H         | -2.69862 | 2.56387  | -0.79655 |
| C    | -4.98705 | -0.09667 | -1.58136 | H         | -0.45468 | 3.22797  | -1.59081 |
| C    | -5.84358 | -1.33889 | -1.66396 | H         | 1.12531  | 1.51497  | -2.42967 |
| C    | -5.91628 | -2.10607 | -0.33164 | H         | 0.43630  | -0.87067 | -2.48352 |
| C    | -3.75418 | 0.04984  | -0.72562 | H         | -1.81592 | -1.52664 | -1.69960 |
| C    | -2.42200 | 0.47781  | -1.21949 | H         | -0.14119 | 0.81045  | 0.69185  |

Table S15: Cartesian coordinates of **3b**-BOD-DHA.

| Atom | <i>x</i> | <i>y</i> | <i>z</i> | Continued |          |          |          |
|------|----------|----------|----------|-----------|----------|----------|----------|
| N    | -5.02380 | 2.48827  | -1.70288 | C         | 6.49911  | 0.21349  | 1.52434  |
| C    | -4.54849 | 1.80140  | -0.91345 | C         | 6.66207  | -1.31702 | 1.42003  |
| C    | -3.94382 | 0.88222  | 0.06856  | C         | -0.07915 | 0.95915  | -0.23593 |
| C    | -4.72827 | -0.48767 | 0.03444  | C         | -2.47977 | -0.76592 | -0.77327 |
| C    | -3.75762 | -1.42951 | -0.63691 | C         | -3.95865 | 1.53543  | 1.38630  |
| C    | -4.10101 | -2.66227 | -1.05555 | N         | -3.95418 | 2.02969  | 2.42354  |
| C    | -5.37086 | -3.29150 | -0.78182 | H         | -5.62953 | -0.37312 | -0.57664 |
| C    | -6.13711 | -3.08598 | 0.31759  | H         | -3.37574 | -3.23672 | -1.62644 |
| C    | -5.81010 | -2.21935 | 1.43207  | H         | -5.67619 | -4.08037 | -1.46425 |
| C    | -5.11280 | -1.07588 | 1.36466  | H         | -7.01102 | -3.72021 | 0.44164  |
| C    | -2.50727 | 0.50997  | -0.36010 | H         | -6.15080 | -2.54826 | 2.41059  |
| C    | -1.38335 | 1.45436  | -0.30060 | H         | -4.84305 | -0.55523 | 2.27795  |
| C    | -1.57053 | 2.84092  | -0.30196 | H         | -2.56552 | 3.26771  | -0.35112 |
| C    | -0.48182 | 3.70249  | -0.25934 | H         | -0.64883 | 4.77377  | -0.26495 |
| C    | 0.81022  | 3.20509  | -0.21251 | H         | 1.66108  | 3.87601  | -0.17904 |
| C    | 1.01772  | 1.82121  | -0.20047 | H         | 6.29668  | -2.85556 | -0.12225 |
| C    | 2.32961  | 1.26513  | -0.14396 | H         | 7.75514  | -1.51467 | -1.66343 |
| C    | 3.40630  | 0.72299  | -0.10733 | H         | 7.49847  | 1.03092  | -1.49305 |
| C    | 4.64240  | 0.04497  | -0.06608 | H         | 5.82880  | 1.84383  | 0.19321  |
| C    | 4.78446  | -1.29319 | -0.15580 | H         | 5.80080  | 0.48481  | 2.31922  |
| C    | 3.69608  | -2.19054 | -0.31006 | H         | 7.45180  | 0.69932  | 1.74410  |
| N    | 2.81955  | -2.93036 | -0.43519 | H         | 7.70021  | -1.61665 | 1.57706  |
| C    | 6.21610  | -1.77554 | -0.00899 | H         | 6.05433  | -1.83180 | 2.16734  |
| C    | 7.07764  | -1.00579 | -0.98791 | H         | 0.10262  | -0.10863 | -0.19058 |
| C    | 6.94481  | 0.31310  | -0.89939 | H         | -1.60369 | -1.26071 | -1.17596 |
| C    | 5.96136  | 0.76364  | 0.15983  |           |          |          |          |

Table S16: Cartesian coordinates of **3b**-TCO-VHF.

| Atom | $x$      | $y$      | $z$      | Continued |          |          |          |
|------|----------|----------|----------|-----------|----------|----------|----------|
| N    | -4.69117 | 4.24306  | -1.12131 | C         | 7.23682  | 0.55125  | -0.06403 |
| C    | -3.87309 | 3.62872  | -0.58969 | C         | 6.28620  | 1.72524  | -0.35597 |
| C    | -2.87608 | 2.84374  | 0.06483  | C         | 5.17480  | -1.11901 | -0.08992 |
| C    | -1.77411 | 3.56510  | 0.61516  | C         | 4.76374  | -2.27211 | 0.63513  |
| N    | -0.89267 | 4.16986  | 1.04666  | N         | 4.42711  | -3.20591 | 1.22152  |
| C    | -3.00326 | 1.47956  | 0.17015  | C         | -0.61519 | 0.75998  | 0.35029  |
| C    | -4.20923 | 0.83159  | -0.27430 | H         | -5.06676 | 1.48863  | -0.38886 |
| C    | -4.41685 | -0.49192 | -0.56999 | H         | -6.43419 | -0.03834 | -1.13783 |
| C    | -5.78161 | -0.87577 | -0.90228 | H         | -7.42940 | -2.10211 | -1.12941 |
| C    | -6.36688 | -2.09434 | -0.90054 | H         | -6.52160 | -4.19180 | -0.49410 |
| C    | -5.80567 | -3.38120 | -0.59644 | H         | -4.24750 | -4.73620 | -0.29882 |
| C    | -4.49579 | -3.69463 | -0.48189 | H         | -2.41398 | -3.30739 | -0.74692 |
| C    | -3.37668 | -2.81098 | -0.65528 | H         | -2.35336 | -1.03390 | -0.86300 |
| C    | -3.33629 | -1.46112 | -0.70588 | H         | -3.24503 | -0.16727 | 2.28042  |
| C    | -1.92158 | 0.70060  | 0.82557  | H         | -1.46636 | -1.50940 | 3.35902  |
| C    | -2.22583 | -0.12101 | 1.91230  | H         | 0.85047  | -1.43484 | 2.48332  |
| C    | -1.22864 | -0.87721 | 2.51050  | H         | 4.26451  | 2.09348  | -1.11968 |
| C    | 0.07123  | -0.83516 | 2.02641  | H         | 4.16879  | 0.17673  | -2.73668 |
| C    | 0.38919  | -0.01211 | 0.94042  | H         | 5.82225  | -1.90590 | -2.18533 |
| C    | 1.72580  | 0.03615  | 0.44269  | H         | 7.27225  | -1.63984 | -0.16387 |
| C    | 2.86054  | 0.06946  | 0.04055  | H         | 7.53882  | 0.55297  | 0.98641  |
| C    | 4.20914  | 0.06367  | -0.40261 | H         | 8.15608  | 0.64722  | -0.64873 |
| C    | 4.95285  | 1.28018  | -0.90822 | H         | 6.73919  | 2.41421  | -1.07434 |
| C    | 4.76056  | 0.11917  | -1.83322 | H         | 6.10299  | 2.30473  | 0.55246  |
| C    | 5.70512  | -1.05666 | -1.52585 | H         | -0.37063 | 1.39262  | -0.49562 |
| C    | 6.62590  | -0.79327 | -0.37899 |           |          |          |          |

## References

- (S1) Chai, J.-D.; Head-Gordon, M. Long-range corrected hybrid density functionals with damped atom–atom dispersion corrections. *Phys. Chem. Chem. Phys.* **2008**, *10*, 6615–6620.
- (S2) Krishnan, R.; Binkley, J. S.; Seeger, R.; Pople, J. A. Self-consistent molecular orbital methods. XX. A basis set for correlated wave functions. *J. Chem. Phys.* **1980**, *72*, 650–654.
- (S3) Zhao, Y.; Truhlar, D. G. The M06 suite of density functionals for main group thermochemistry, thermochemical kinetics, noncovalent interactions, excited states, and transition elements: two new functionals and systematic testing of four M06-class functionals and 12 other functionals. *Theor. Chem. Acc.* **2008**, *120*, 215–241.
- (S4) Frisch, M. J. et al. Gaussian 16 Revision A.03. 2016; Gaussian Inc. Wallingford CT.
